# Supplementary material for: Widespread contribution of transposable elements to the rewiring of mammalian 3D genomes
Source: PubMed Central journal article supplement (PMC9902604; doi:10.1038/s41467-023-36364-9), 2023-02-06
Supplement: 41467_2023_36364_MOESM1_ESM.pdf [file 41467_2023_36364_MOESM1_ESM.pdf]

# Supplementary Information

Supplementary Figure 1: Data Set Resolution compared with TE Contribution to Loop Anchors

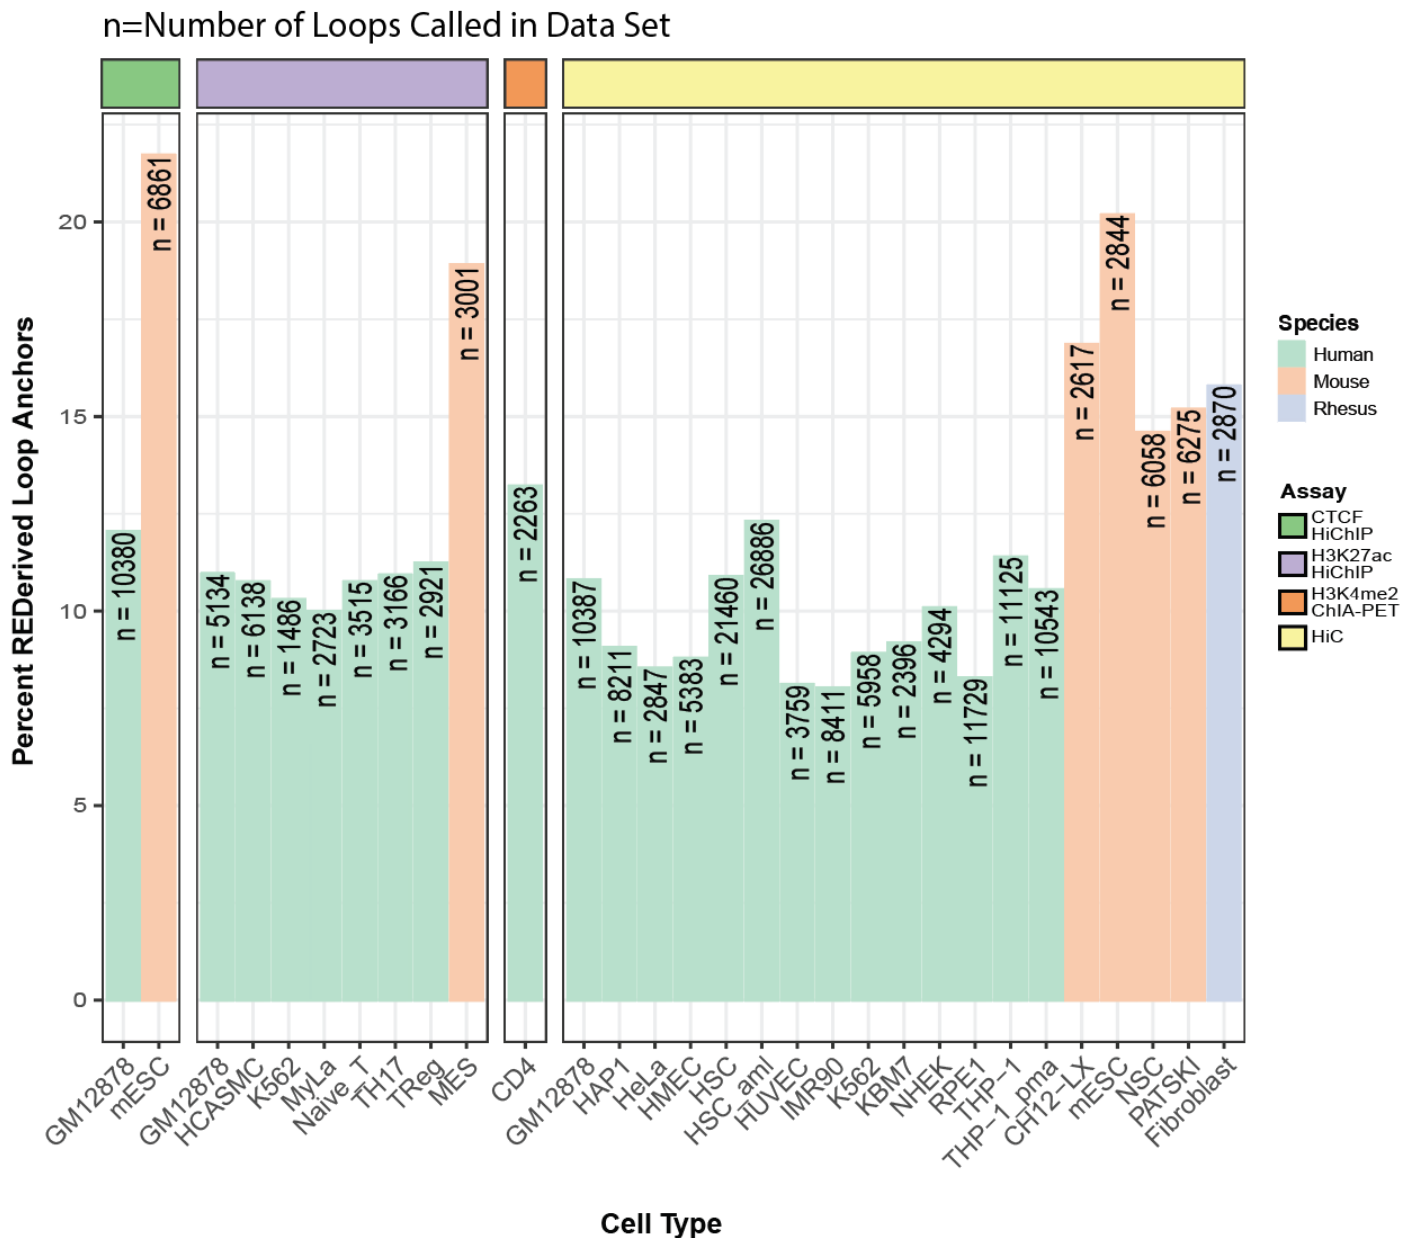

The number of loops called in each dataset is displayed in each of the corresponding bars. The y-axis shows the percent of loop anchors that overlap a repetitive element for each of the included datasets.



### Supplementary Figure 3: Comparison of Human and Dog Liver CTCF TAD Boundaries

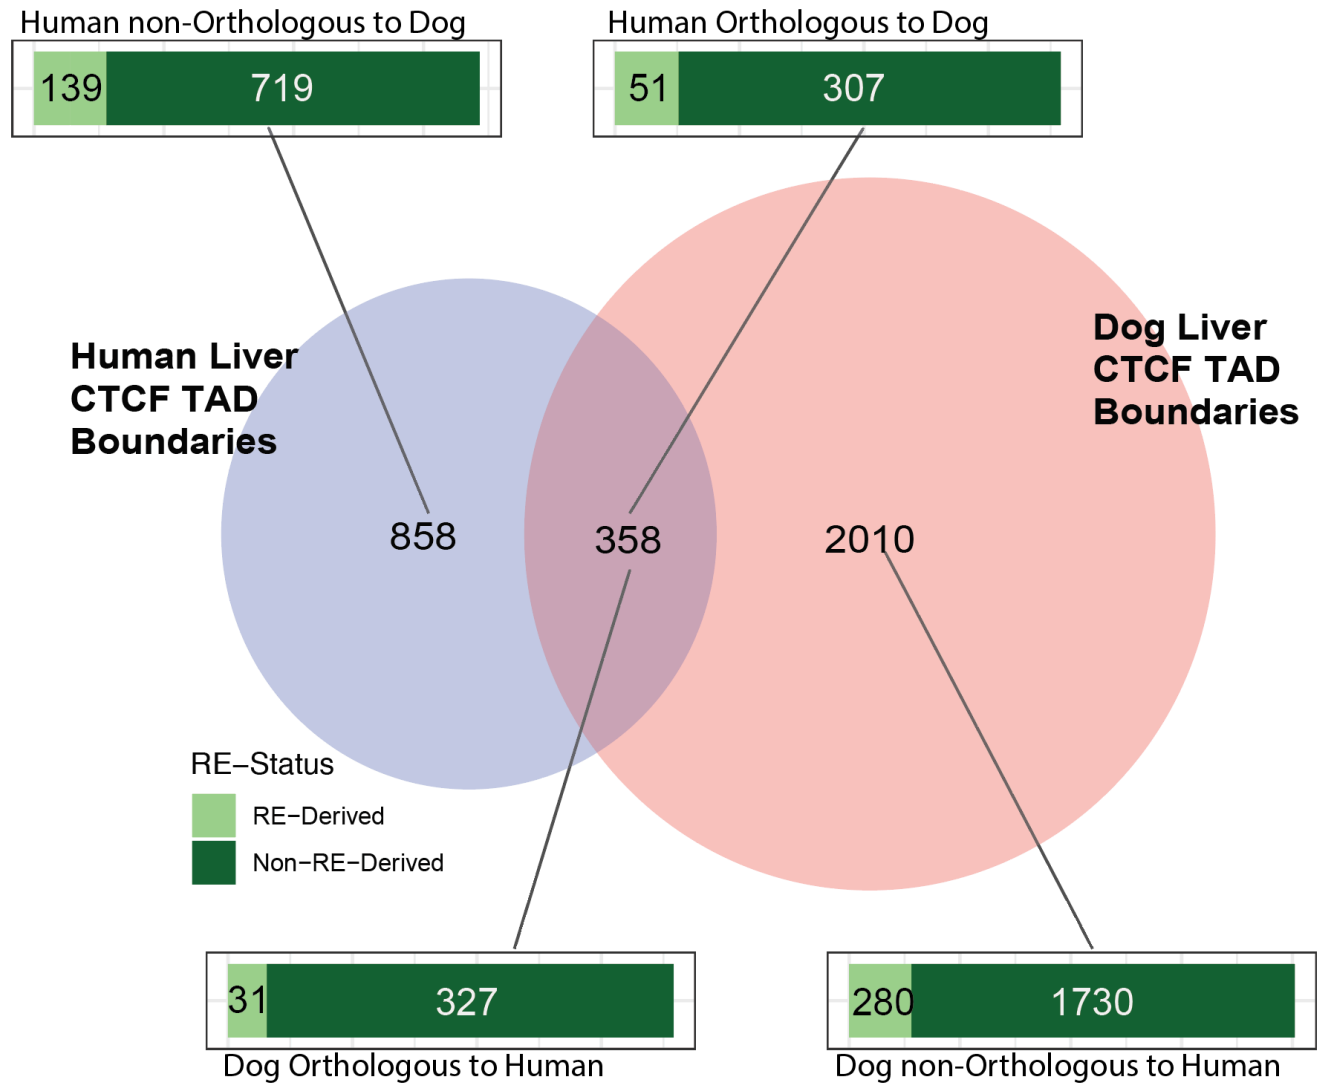

Dog liver TAD boundary data from Rudan et. al was lifted over from canFam3 to hg19 and compared with human liver data from Schmitt et. al to identify orthologous and non-orthologous CTCF TAD boundaries. The human liver data from Schmitt et. al was similarly lifted over to the canFam3 genome and compared to the dog liver data. These orthologous and non-orthologous TAD boundaries were then intersected with repeatMasker to identify RE-derived CTCF boundaries.

## Supplementary Figure 4: MER57A1 Derived Loop Anchor

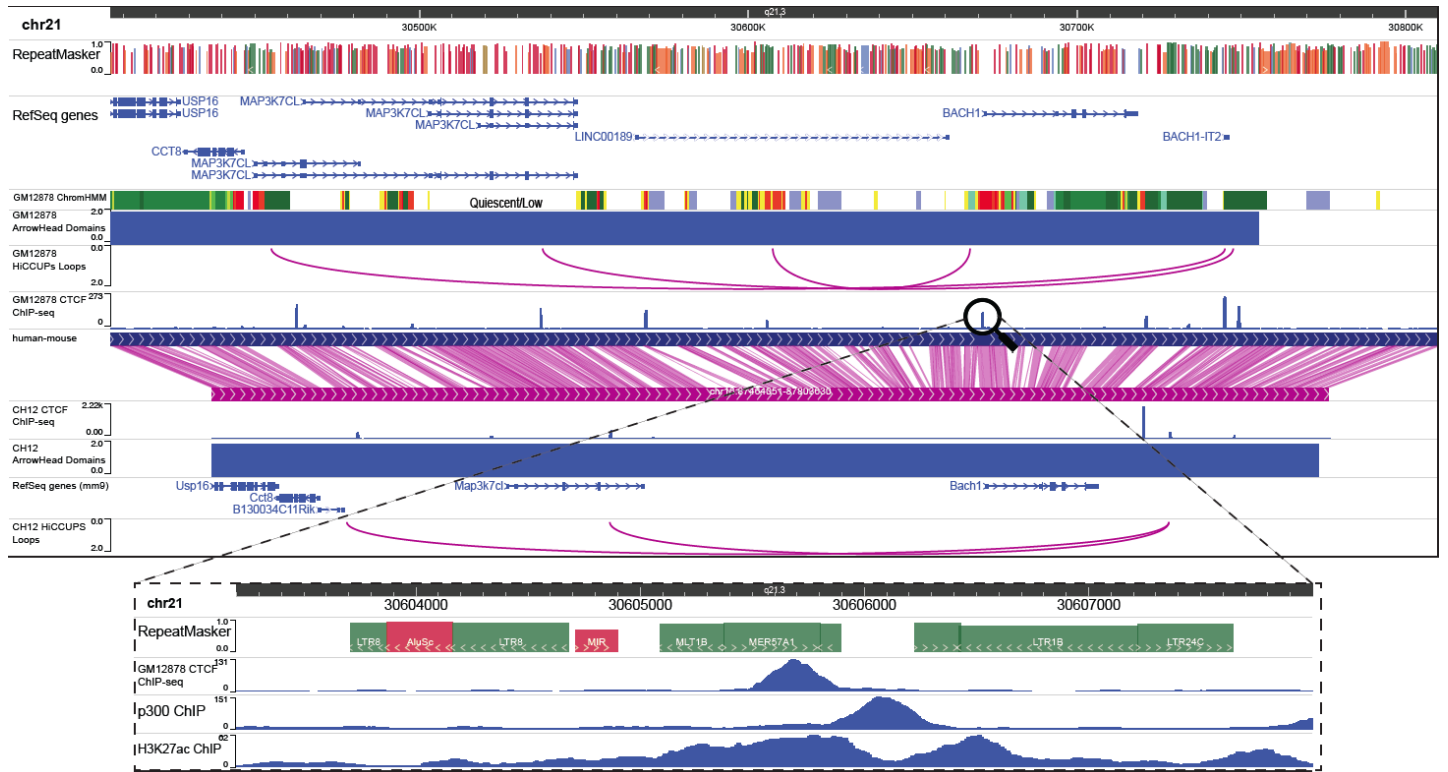

Genome browser screenshot displaying the MER57A1 candidate and the local histone, binding, 3D landscape in human (main top) and mouse (main bottom). Zoomed in view of the MER57A1 candidate with CTCF, p300, and H3K27ac ChIP-seq peaks (inset).

## Supplementary Figure 5: LTR13 Derived Loop Anchor

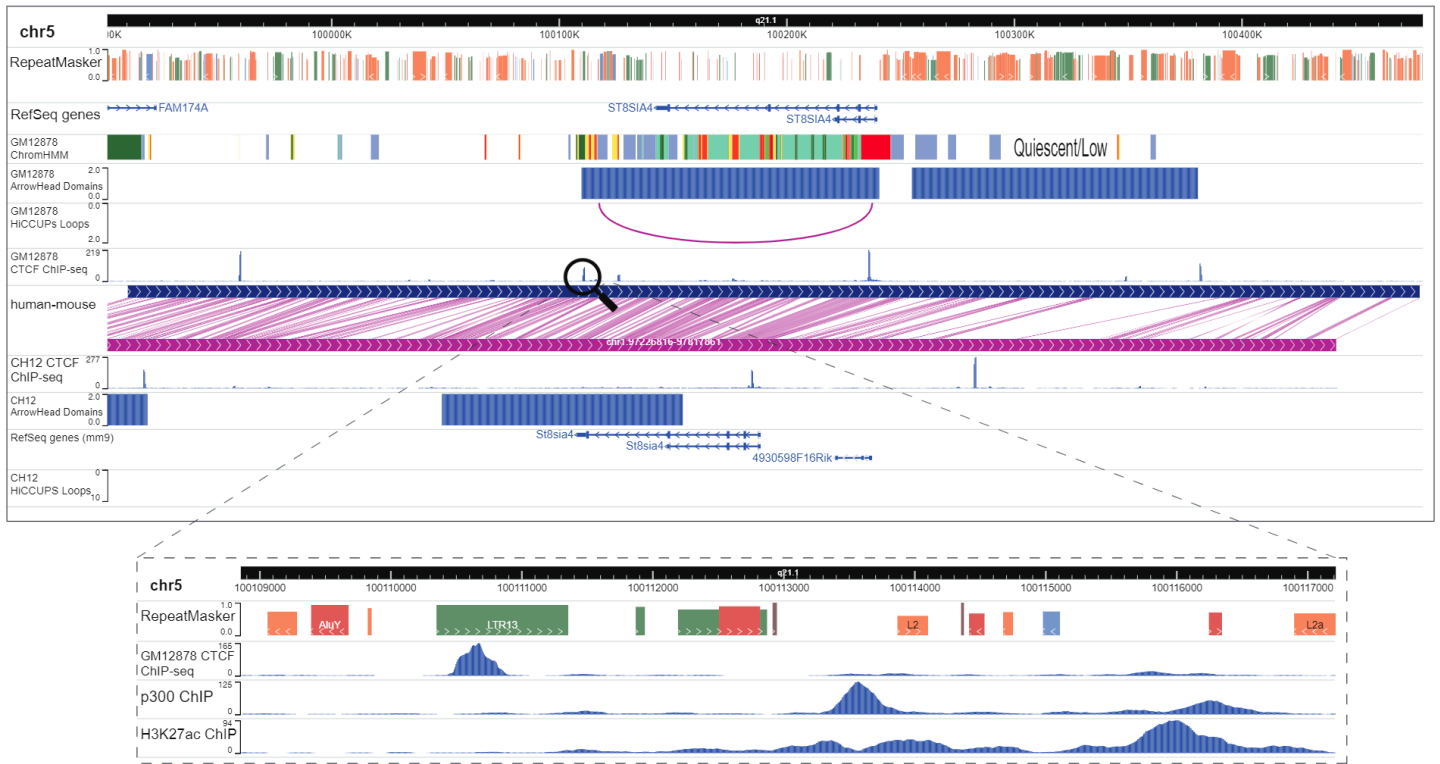

Genome browser screenshot displaying the LTR13 candidate and the local histone, binding, 3D landscape in human (main top) and mouse (main bottom). Zoomed in view of the LTR13 candidate with CTCF, p300, and H3K27ac ChIP-seq peaks (inset).

## Supplementary Figure 6: L1MC1-KO specific deletions:

Primers, L2 sgRNA, R1 sgRNA, R2 sgRNA, L1MC1, CTCF Motif

Genomic Sequence:

**TTCACGCTTCACTTGTCTGC**gtacctcattcttcttagacgcaggacaagagctctggcaaaggcgctgcagccacagaggttc  
cggccggaaaaatcggcaccacagagatcccatgagaacgtcacgtacagcactgagacggagccctaataaaaactgtggctct  
**gggtgataatgacgttactgtggg**ttcatcaactgtagcaaatc**gcctctgctggg**cggtgttgaaatgcagagg**ctctggg**  
**gggtcaggtatgt**gggagctctctgtacctttcttgaatttgatgtgaacttaagctgctccaaaaagataaaatcttgaaga  
aaagcgaaaaaaaaaaggaagagagggaaaaaat**gacaggcagaaggtcacgcctgg**ccctcagtgcgctcctcaggcctc  
tgctccagctggggctggcaggtggcggggggcaccagctcctccactccccacgcccaccacagctttcaaagttaggaa  
cacaggcaggt**GGAGGTGAAGTCCGAACAGA**

Clone 1 (from forward primer):

**TTCACGCTTCACTTGTCTGC**gtacctcattcttcttagacgcaggacaagagctctggcaaaggcgctgcagccacagagg  
tttccggccggaaaaatcggcaccacagagatcccatgagaacgtcacgtacagcactgagacggagccctaataaaaact  
gtggctctg**gggtgataatgacgtta**.....  
.....**tgt**gggagctctctgtacctttcttgaatttgatgtgaacttaagctgctccaaaa  
gataaaatcttgaagaaaagcgaaaaaaaaaaggaagagagggaaaaaat**gacaggcagaaggtcacgcctgg**ccctc  
agtgcgctcctcaggcctctgctccagctggggctggcaggtggcggggggcaccagctcctccactccccacgccc  
caccacagctttcaaagttaggaaacagggcaggt**GGAGGTGAAGTCCGAACAGA**

Clone 47 (Heterozygous, double knockout)

**TTCACGCTTCACTTGTCTGC**gtacctcattcttcttagacgcaggacaagagctctggcaaaggcgctgcagccacagagg  
tttccggccggaaaaatcggcaccacagagatcccatgagaacgtcacgtacagcactgagacggagccctaataaaaact  
gtggctct**gggtgataatgacgttactgtggg**ttcatcaactgtagcaaatc**gcctctgctggg**cggtgttgaaatgc  
**agaggctctggggggtcaggtatgtgggagctctctgtacctttcttgaatttgatgtgaacttaagctgctccaaaa**  
**gataaaatcttgaagaaaagcgaaaaaaaaaaggaagagagggaaaaaat****gacaggcagaaggtcacgcctgg**ccctc  
agtgcgctcctcaggcctctgctccagctggggctggcaggtggcggggggcaccagctcctccactccccacgccc  
caccacagctttcaaagttaggaaacagggcaggt**GGAGGTGAAGTCCGAACAGA**

**TTCACGCTTCACTTGTCTGC**gtacctcattcttcttagacgcaggacaagagctctggcaaaggcgctgcagccacagagg  
tttccggccggaaaaatcggcaccacagagatcccatgagaacgtcacgtacagcactgagacggagccctaataaaaact  
gtggctct**gggtgataatgacgttactgtggg**ttcatcaactgtagcaaatc**gcctctgctggg**cggtgttgaaatgc  
**agaggctctggggggtcaggtatgtgggagctctctgtacctttcttgaatttgatgtgaacttaagctgctccaaaa**  
**gataaaatcttgaagaaaagcgaaaaaaaaaaggaagagagggaaaaaat****gacaggcagaaggtcacgcctgg**ccctc  
agtgcgctcctcaggcctctgctccagctggggctggcaggtggcggggggcaccagctcctccactccccacgccc  
caccacagctttcaaagttaggaaacagggcaggt**GGAGGTGAAGTCCGAACAGA**

Deletions of the L1MC1-derived CTCF were confirmed via Sanger sequencing for two clones. The exact placement of the deletions is depicted in red.

## Supplementary Figure 7: Virtual 4C Analysis of Downstream Enhancers

### Virtual 4C Analysis of Downstream Enhancers

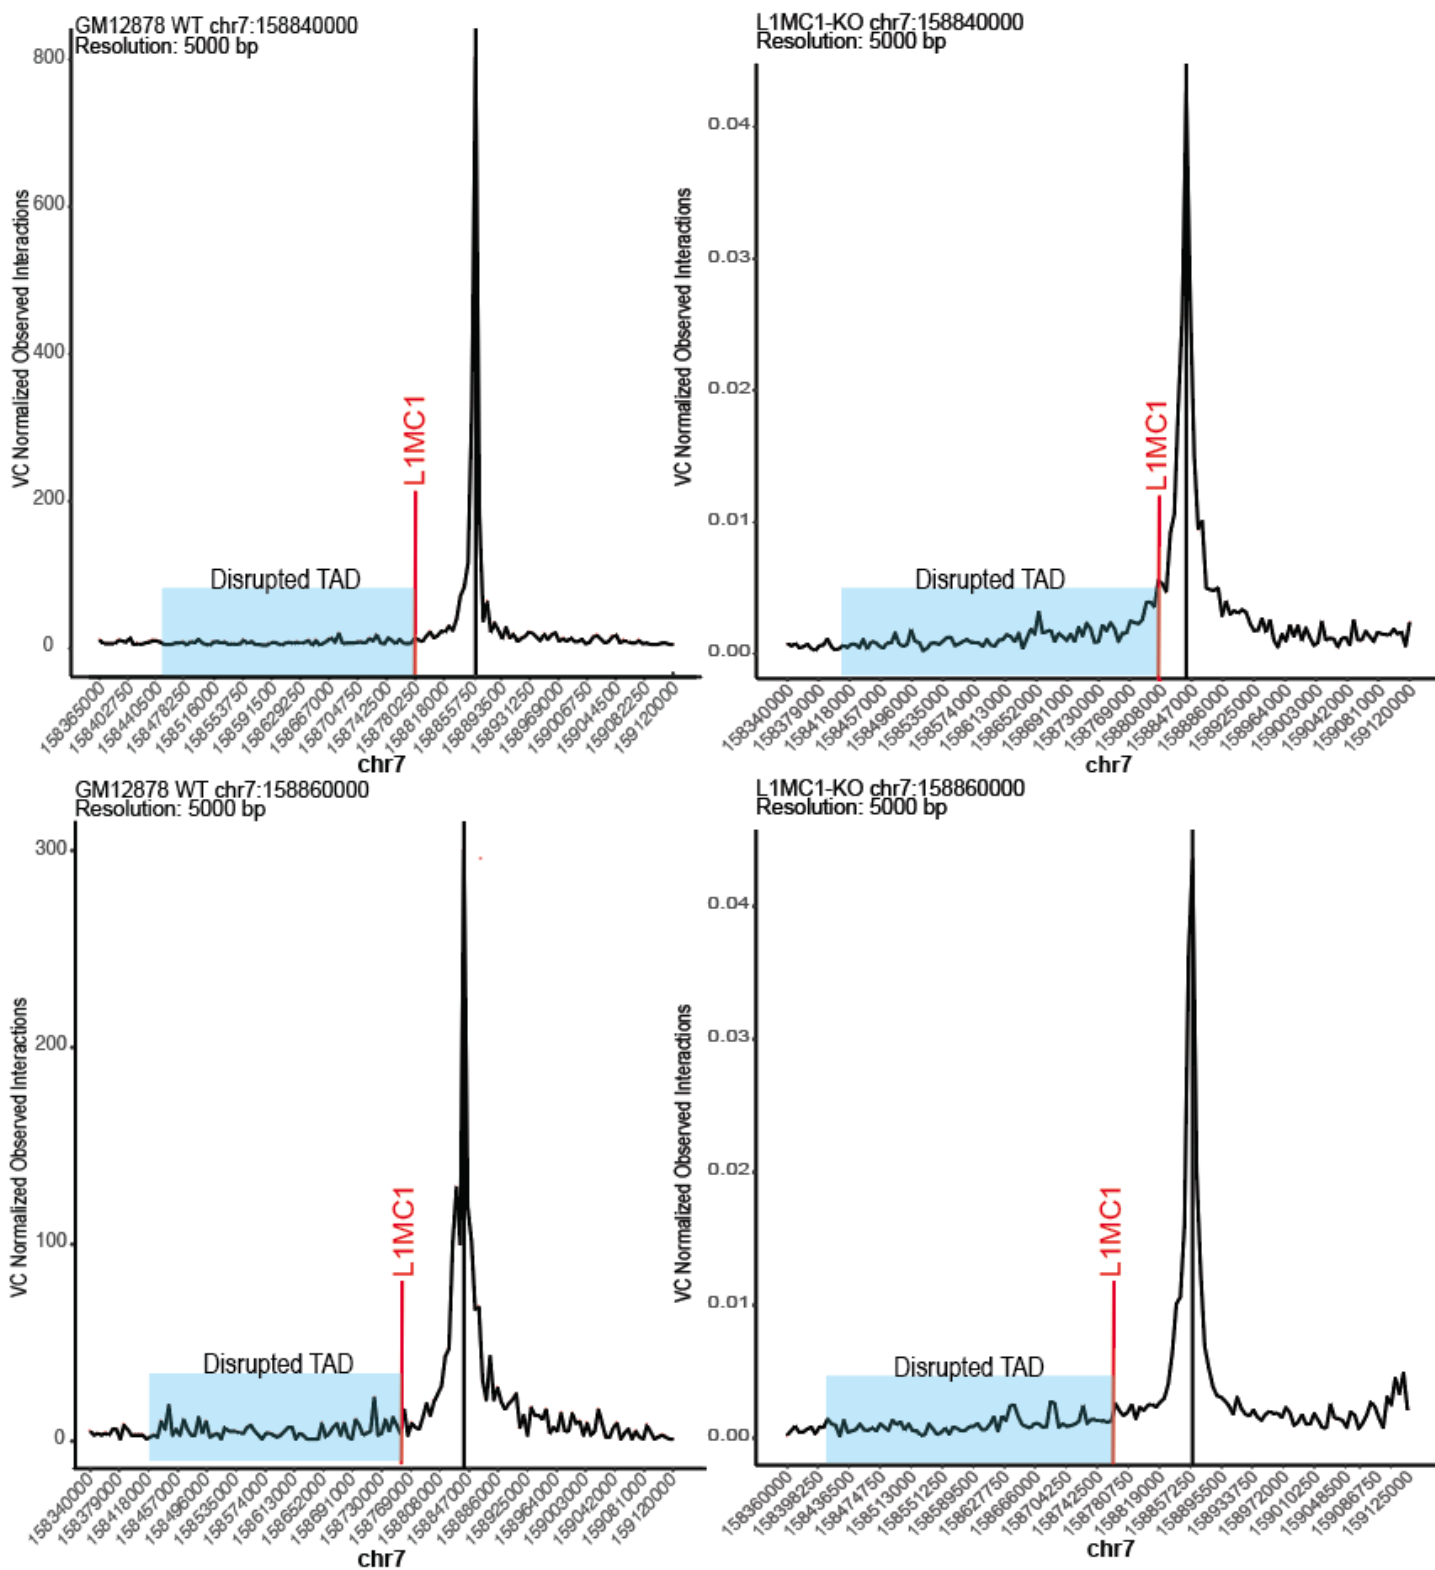

Virtual 4C analysis showing interactions between downstream enhancers and active domain in wildtype and L1MC1-KO lines.

## Supplementary Table 1: Loop and TAD Call Data Sources

Data sources of loop and TAD calls used in all analyses.

| Species | Structure | Assay            | Cell Type          | Link                                                                                                                                  |
|---------|-----------|------------------|--------------------|---------------------------------------------------------------------------------------------------------------------------------------|
| Human   | TADs      | Hi-C             | HSC_aml            | <a href="https://www.biorxiv.org/content/10.1101/2020.04.18.047738v1">https://www.biorxiv.org/content/10.1101/2020.04.18.047738v1</a> |
| Human   | TADs      | Hi-C             | HSC_aml            |                                                                                                                                       |
| Human   | TADs      | Hi-C             | HSC_aml            |                                                                                                                                       |
| Human   | TADs      | Hi-C             | HSC                |                                                                                                                                       |
| Human   | TADs      | Hi-C             | HSC                |                                                                                                                                       |
| Human   | TADs      | Hi-C             | HSC                |                                                                                                                                       |
| Human   | Loops     | Hi-C             | HSC_aml            |                                                                                                                                       |
| Human   | Loops     | Hi-C             | HSC_aml            |                                                                                                                                       |
| Human   | Loops     | Hi-C             | HSC_aml            |                                                                                                                                       |
| Human   | Loops     | Hi-C             | HSC                |                                                                                                                                       |
| Human   | Loops     | Hi-C             | HSC                |                                                                                                                                       |
| Human   | Loops     | Hi-C             | HSC                |                                                                                                                                       |
| Human   | Loops     | H3K4me2_ChIA-PET | CD4+ T Cells (CD4) |                                                                                                                                       |
| Human   | TADs      | Hi-C             | Cortex             | <a href="https://www.nature.com/articles/nature11082">https://www.nature.com/articles/nature11082</a>                                 |
| Human   | TADs      | Hi-C             | hESC               |                                                                                                                                       |
| Human   | TADs      | Hi-C             | IMR90              |                                                                                                                                       |
| Human   | Loops     | H3K27ac_HiC hIP  | GM12878            | <a href="https://www.nature.com/articles/ng.3963">https://www.nature.com/articles/ng.3963</a>                                         |
| Human   | Loops     | H3K27ac_HiC hIP  | HCASMC             |                                                                                                                                       |
| Human   | Loops     | H3K27ac_HiC hIP  | K562               |                                                                                                                                       |
| Human   | Loops     | H3K27ac_HiC hIP  | MyLa               |                                                                                                                                       |
| Human   | Loops     | H3K27ac_HiC hIP  | Naive_T            |                                                                                                                                       |
| Human   | Loops     | H3K27ac_HiC hIP  | TH17               |                                                                                                                                       |
| Human   | Loops     | H3K27ac_HiC hIP  | TReg               |                                                                                                                                       |
| Mouse   | Loops     | H3K27ac_HiC hIP  | MES                |                                                                                                                                       |
| Human   | Loops     | CTCF_HiChIP      | GM12878            |                                                                                                                                       |
| Mouse   | Loops     | CTCF_HiChIP      | mESC               |                                                                                                                                       |
| Human   | TADs      | Hi-C             | hESC               | <a href="https://www.nature.com/articles/s41586-019-1812-0">https://www.nature.com/articles/s41586-019-1812-0</a>                     |
| Human   | TADs      | Hi-C             | hESC               |                                                                                                                                       |
| Human   | TADs      | Hi-C             | hESC               |                                                                                                                                       |
| Human   | TADs      | Hi-C             | hESC               |                                                                                                                                       |
| Human   | TADs      | Hi-C             | hESC               |                                                                                                                                       |
| Mouse   | TADs      | Hi-C             | mESC               |                                                                                                                                       |
| Mouse   | TADs      | Hi-C             | mESC               |                                                                                                                                       |
| Mouse   | TADs      | Hi-C             | mESC               |                                                                                                                                       |
| Human   | TADs      | Hi-C             | Lymphoma           |                                                                                                                                       |



|                |       |      |                        |                                                                                                                                           |                                                                                                                           |
|----------------|-------|------|------------------------|-------------------------------------------------------------------------------------------------------------------------------------------|---------------------------------------------------------------------------------------------------------------------------|
| Human          | TADs  | Hi-C | Lymphoma               |                                                                                                                                           |                                                                                                                           |
| Dog            | TADs  | Hi-C | Liver                  | <a href="https://www.ncbi.nlm.nih.gov/pmc/articles/PMC4542312/">https://www.ncbi.nlm.nih.gov/pmc/articles/PMC4542312/</a>                 |                                                                                                                           |
| Human          | TADs  | Hi-C | RPE1                   | <a href="https://www.ncbi.nlm.nih.gov/pmc/articles/PMC4978254/#d36e641">https://www.ncbi.nlm.nih.gov/pmc/articles/PMC4978254/#d36e641</a> |                                                                                                                           |
| Human          | TADs  | Hi-C | RPE1                   |                                                                                                                                           |                                                                                                                           |
| Human          | TADs  | Hi-C | RPE1                   |                                                                                                                                           |                                                                                                                           |
| Mouse          | TADs  | Hi-C | PATSKI                 |                                                                                                                                           |                                                                                                                           |
| Mouse          | TADs  | Hi-C | mESC                   |                                                                                                                                           |                                                                                                                           |
| Rhesus Macaque | TADs  | Hi-C | Fibroblasts            |                                                                                                                                           |                                                                                                                           |
| Human          | Loops | Hi-C | RPE1                   |                                                                                                                                           |                                                                                                                           |
| Human          | Loops | Hi-C | RPE1                   |                                                                                                                                           |                                                                                                                           |
| Human          | Loops | Hi-C | RPE1                   |                                                                                                                                           |                                                                                                                           |
| Mouse          | Loops | Hi-C | PATSKI                 |                                                                                                                                           |                                                                                                                           |
| Rhesus Macaque | Loops | Hi-C | Fibroblasts            |                                                                                                                                           |                                                                                                                           |
| Mouse          | TADs  | Hi-C | G1E-ER4                |                                                                                                                                           | <a href="https://www.ncbi.nlm.nih.gov/pmc/articles/PMC5393350/">https://www.ncbi.nlm.nih.gov/pmc/articles/PMC5393350/</a> |
| Mouse          | TADs  | Hi-C | G1E-ER4                |                                                                                                                                           |                                                                                                                           |
| Human          | TADs  | Hi-C | Adrenal Cells (AD)     | <a href="https://www.ncbi.nlm.nih.gov/pmc/articles/PMC5478386/">https://www.ncbi.nlm.nih.gov/pmc/articles/PMC5478386/</a>                 |                                                                                                                           |
| Human          | TADs  | Hi-C | Aorta (AO)             |                                                                                                                                           |                                                                                                                           |
| Human          | TADs  | Hi-C | Bladder (BL)           |                                                                                                                                           |                                                                                                                           |
| Human          | TADs  | Hi-C | Cortex (CO)            |                                                                                                                                           |                                                                                                                           |
| Human          | TADs  | Hi-C | GM12878                |                                                                                                                                           |                                                                                                                           |
| Human          | TADs  | Hi-C | hESC (H1)              |                                                                                                                                           |                                                                                                                           |
| Human          | TADs  | Hi-C | Hippocampus (HC)       |                                                                                                                                           |                                                                                                                           |
| Human          | TADs  | Hi-C | IMR90                  |                                                                                                                                           |                                                                                                                           |
| Human          | TADs  | Hi-C | Lung (LG)              |                                                                                                                                           |                                                                                                                           |
| Human          | TADs  | Hi-C | Liver(LI)              |                                                                                                                                           |                                                                                                                           |
| Human          | TADs  | Hi-C | Left Ventricular (LV)  |                                                                                                                                           |                                                                                                                           |
| Human          | TADs  | Hi-C | Mesendoderm (MES)      |                                                                                                                                           |                                                                                                                           |
| Human          | TADs  | Hi-C | Mesenchymal (MSC)      |                                                                                                                                           |                                                                                                                           |
| Human          | TADs  | Hi-C | NPC                    |                                                                                                                                           |                                                                                                                           |
| Human          | TADs  | Hi-C | Ovary (OV)             |                                                                                                                                           |                                                                                                                           |
| Human          | TADs  | Hi-C | Pancreas (PA)          |                                                                                                                                           |                                                                                                                           |
| Human          | TADs  | Hi-C | Psoas Muscle (PO)      |                                                                                                                                           |                                                                                                                           |
| Human          | TADs  | Hi-C | Right Ventricular (RV) |                                                                                                                                           |                                                                                                                           |

|       |       |               |                        |                                                                                                                                                                                                                                                        |                                                                                                                                                       |
|-------|-------|---------------|------------------------|--------------------------------------------------------------------------------------------------------------------------------------------------------------------------------------------------------------------------------------------------------|-------------------------------------------------------------------------------------------------------------------------------------------------------|
| Human | TADs  | Hi-C          | Small Bowel (SB)       |                                                                                                                                                                                                                                                        |                                                                                                                                                       |
| Human | TADs  | Hi-C          | Spleen (SX)            |                                                                                                                                                                                                                                                        |                                                                                                                                                       |
| Human | TADs  | Hi-C          | Trophoblast-like (TRO) |                                                                                                                                                                                                                                                        |                                                                                                                                                       |
| Human | Loops | Hi-C          | THP-1_pma              | <a href="https://www.ncbi.nlm.nih.gov/pmc/articles/PMC5610110/">https://www.ncbi.nlm.nih.gov/pmc/articles/PMC5610110/</a>                                                                                                                              |                                                                                                                                                       |
| Human | Loops | Hi-C          | THP-1                  |                                                                                                                                                                                                                                                        |                                                                                                                                                       |
| Mouse | TADs  | Hi-C          | AML12                  | <a href="https://www.ncbi.nlm.nih.gov/pmc/articles/PMC5793783/">https://www.ncbi.nlm.nih.gov/pmc/articles/PMC5793783/</a><br><a href="https://www.ncbi.nlm.nih.gov/pmc/articles/PMC6327227/">https://www.ncbi.nlm.nih.gov/pmc/articles/PMC6327227/</a> |                                                                                                                                                       |
| Mouse | Loops | Hi-C          | mESC                   |                                                                                                                                                                                                                                                        |                                                                                                                                                       |
| Mouse | Loops | Hi-C          | NSC                    |                                                                                                                                                                                                                                                        |                                                                                                                                                       |
| Human | TADs  | Hi-C          | LCL                    | <a href="https://www.ncbi.nlm.nih.gov/pmc/articles/PMC6883528/">https://www.ncbi.nlm.nih.gov/pmc/articles/PMC6883528/</a>                                                                                                                              |                                                                                                                                                       |
| Human | Loops | CTCF_ChIA-PET | Consensus              |                                                                                                                                                                                                                                                        |                                                                                                                                                       |
| Mouse | TADs  | Hi-C          | CH12-LX                | <a href="https://www.ncbi.nlm.nih.gov/pubmed/25497547">https://www.ncbi.nlm.nih.gov/pubmed/25497547</a>                                                                                                                                                |                                                                                                                                                       |
| Human | TADs  | Hi-C          | GM12878                |                                                                                                                                                                                                                                                        |                                                                                                                                                       |
| Human | TADs  | Hi-C          | HeLa                   |                                                                                                                                                                                                                                                        |                                                                                                                                                       |
| Human | TADs  | Hi-C          | HMEC                   |                                                                                                                                                                                                                                                        |                                                                                                                                                       |
| Human | TADs  | Hi-C          | HUVEC                  |                                                                                                                                                                                                                                                        |                                                                                                                                                       |
| Human | TADs  | Hi-C          | IMR90                  |                                                                                                                                                                                                                                                        |                                                                                                                                                       |
| Human | TADs  | Hi-C          | K562                   |                                                                                                                                                                                                                                                        |                                                                                                                                                       |
| Human | TADs  | Hi-C          | KBM7                   |                                                                                                                                                                                                                                                        |                                                                                                                                                       |
| Human | TADs  | Hi-C          | NHEK                   |                                                                                                                                                                                                                                                        |                                                                                                                                                       |
| Human | Loops | Hi-C          | GM12878                |                                                                                                                                                                                                                                                        |                                                                                                                                                       |
| Human | Loops | Hi-C          | HeLa                   |                                                                                                                                                                                                                                                        |                                                                                                                                                       |
| Human | Loops | Hi-C          | HMEC                   |                                                                                                                                                                                                                                                        |                                                                                                                                                       |
| Human | Loops | Hi-C          | HUVEC                  |                                                                                                                                                                                                                                                        |                                                                                                                                                       |
| Human | Loops | Hi-C          | IMR90                  |                                                                                                                                                                                                                                                        |                                                                                                                                                       |
| Human | Loops | Hi-C          | K562                   |                                                                                                                                                                                                                                                        |                                                                                                                                                       |
| Human | Loops | Hi-C          | KBM7                   |                                                                                                                                                                                                                                                        |                                                                                                                                                       |
| Human | Loops | Hi-C          | NHEK                   |                                                                                                                                                                                                                                                        |                                                                                                                                                       |
| Mouse | Loops | Hi-C          | CH12-LX                |                                                                                                                                                                                                                                                        |                                                                                                                                                       |
| Human | TADs  | Hi-C          | HAP1                   |                                                                                                                                                                                                                                                        | <a href="https://www.pnas.org/content/112/47/E6456.long">https://www.pnas.org/content/112/47/E6456.long</a>                                           |
| Human | Loops | Hi-C          | HAP1                   |                                                                                                                                                                                                                                                        |                                                                                                                                                       |
| Human | Loops | Hi-C          | HSC                    |                                                                                                                                                                                                                                                        | <a href="https://www.sciencedirect.com/science/article/pii/S1097276520302604">https://www.sciencedirect.com/science/article/pii/S1097276520302604</a> |

**Supplementary Table 2: L1MC1-KO1 HiC<sup>2</sup> Library Statistics**

|                                    |                              |
|------------------------------------|------------------------------|
| Sequenced Read Pairs               | 101,630,014                  |
| Normal Paired                      | 90,448,638 (89.00%)          |
| Chimeric Paired                    | 4,407,936 (4.34%)            |
| Chimeric Ambiguous                 | 3,513,938 (3.46%)            |
| Unmapped                           | 3,259,502 (3.21%)            |
| Ligation Motif Present             | 29,354,231 (28.88%)          |
| Alignable (Normal+Chimeric Paired) | 94,856,574 (93.34%)          |
| Unique Reads                       | 28,973,498 (28.51%)          |
| PCR Duplicates                     | 65,831,160 (64.78%)          |
| Optical Duplicates                 | 51,916 (0.05%)               |
| Library Complexity Estimate        | 30,299,572                   |
| Intra-fragment Reads               | 325,061 (0.32% / 1.12%)      |
| Below MAPQ Threshold               | 19,264,376 (18.96% / 66.49%) |
| Hi-C Contacts                      | 9,384,061 (9.23% / 32.39%)   |
| Ligation Motif Present             | 2,054,781 (2.02% / 7.09%)    |
| 3' Bias (Long Range)               | 69% - 31%                    |
| Pair Type %(L-I-O-R)               | 25% - 25% - 25% - 25%        |
| Inter-chromosomal                  | 2,431,679 (2.39% / 8.39%)    |
| Intra-chromosomal                  | 6,952,382 (6.84% / 24.00%)   |
| Short Range (<20Kb)                | 2,615,029 (2.57% / 9.03%)    |
| Long Range (>20Kb)                 | 4,337,335 (4.27% / 14.97%)   |

**Supplementary Table 3: L1MC1-KO47 HiC<sup>2</sup> Library Statistics**

|                                    |                             |
|------------------------------------|-----------------------------|
| Sequenced Read Pairs               | 29,681,164                  |
| Normal Paired                      | 26,419,325 (89.01%)         |
| Chimeric Paired                    | 1,505,030 (5.07%)           |
| Chimeric Ambiguous                 | 835,886 (2.82%)             |
| Unmapped                           | 920,923 (3.10%)             |
| Ligation Motif Present             | 8,772,298 (29.56%)          |
| Alignable (Normal+Chimeric Paired) | 27,924,355 (94.08%)         |
| Unique Reads                       | 15,224,433 (51.29%)         |
| PCR Duplicates                     | 12,685,207 (42.74%)         |
| Optical Duplicates                 | 14,715 (0.05%)              |
| Library Complexity Estimate        | 20,445,316                  |
| Intra-fragment Reads               | 166,830 (0.56% / 1.10%)     |
| Below MAPQ Threshold               | 6,958,217 (23.44% / 45.70%) |
| Hi-C Contacts                      | 8,099,386 (27.29% / 53.20%) |
| Ligation Motif Present             | 2,199,042 (7.41% / 14.44%)  |
| 3' Bias (Long Range)               | 71% - 29%                   |
| Pair Type %(L-I-O-R)               | 25% - 25% - 25% - 25%       |
| Inter-chromosomal                  | 1,929,082 (6.50% / 12.67%)  |
| Intra-chromosomal                  | 6,170,304 (20.79% / 40.53%) |
| Short Range (<20Kb)                | 2,227,463 (7.50% / 14.63%)  |
| Long Range (>20Kb)                 | 3,942,828 (13.28% / 25.90%) |

**Supplementary Table 4: GM12878 Wild Type HiC<sup>2</sup> Library Statistics**

|                                    |                              |
|------------------------------------|------------------------------|
| Normal Paired                      | 269,686,068 (83.48%)         |
| Chimeric Paired                    | 16,914,983 (5.24%)           |
| Chimeric Ambiguous                 | 4,759,644 (1.47%)            |
| Unmapped                           | 31,677,013 (9.81%)           |
| Ligation Motif Present             | 84,083,628 (26.03%)          |
| Alignable (Normal+Chimeric Paired) | 286,601,051 (88.72%)         |
| Unique Reads                       | 65,938,196 (20.41%)          |
| PCR Duplicates                     | 220,546,478 (68.27%)         |
| Optical Duplicates                 | 116,377 (0.04%)              |
| Library Complexity Estimate        | 66,859,184                   |
| Intra-fragment Reads               | 799,217 (0.25% / 1.21%)      |
| Below MAPQ Threshold               | 21,862,935 (6.77% / 33.16%)  |
| Hi-C Contacts                      | 43,276,044 (13.40% / 65.63%) |
| Ligation Motif Present             | 11,358,479 (3.52% / 17.23%)  |
| 3' Bias (Long Range)               | 71% - 29%                    |
| Pair Type %(L-I-O-R)               | 25% - 25% - 25% - 25%        |
| Inter-chromosomal                  | 7,210,469 (2.23% / 10.94%)   |
| Intra-chromosomal                  | 36,065,575 (11.16% / 54.70%) |
| Short Range (<20Kb)                | 15,110,002 (4.68% / 22.92%)  |
| Long Range (>20Kb)                 | 20,955,480 (6.49% / 31.78%)  |
